# Supplementary material
Source: PubMed Central journal article supplement (PMC4651071)
Supplement: AEM.02035-15_zam999116759so1.pdf [file AEM.02035-15_zam999116759so1.pdf]

1 **An assessment of the toxicity of CuO nanoparticles using**  
2 **multiple-gene-deleted mutants of *Saccharomyces cerevisiae***

3 Bao Shaopan<sup>1,2</sup>, Lu Qicong<sup>1,2</sup>, Fang Tao<sup>1,\*</sup> #, Dai Heping<sup>1</sup>, Zhang Chao<sup>1,2</sup>

4 <sup>1</sup>Institute of Hydrobiology, Chinese Academy of Sciences, Wuhan, China

5 <sup>2</sup> Graduate University of Chinese Academy of Sciences, Beijing, China

---

#Address correspondence to Fang Tao: [fangt@ihb.ac.cn](mailto:fangt@ihb.ac.cn)

Tel.: +86-27-68780995

6 **Table S1. Yeast strains used in this study**

| Strain             | Genotype                                                                                                         | Source                                                                                                   |
|--------------------|------------------------------------------------------------------------------------------------------------------|----------------------------------------------------------------------------------------------------------|
| BY4741             | <b>MATa</b> <i>his3Δ0 leu2Δ0 met15Δ0 ura3Δ0</i>                                                                  | lab of aquatic animal protein engineering, Institute of Hydrobiology, Chinese Academy of Sciences<br>(1) |
| <i>yap1</i> mutant | <b>MATa</b> <i>his3Δ0 leu2Δ0 met15Δ0 ura3Δ0 yap1Δ::hisG</i>                                                      | (2)                                                                                                      |
| quadruple mutant   | <b>MATa</b> <i>his3Δ0 leu2Δ0 met15Δ0 ura3Δ0 snq2Δ::KanMX, pdr5Δ::LEU2, cwp1Δ::hisG, cwp2Δ::HIS3</i>              | (1)                                                                                                      |
| quintuple mutant   | <b>MATa</b> <i>his3Δ0 leu2Δ0 met15Δ0 ura3Δ0 snq2Δ::KanMX, pdr5Δ::LEU2, cwp1Δ::hisG, cwp2Δ::HIS3, yap1Δ::hisG</i> | (3)                                                                                                      |

7

8 **Growth of yeast *S. cerevisiae* wild-type and mutants**

9 Yeast cells were inoculated in 20 ml of SD medium by overnight (16-18 hour) culturing at  
10 30 °C, 200 rpm under dark conditions, from a single agar plate colony. Diluted the initial  
11 culture optical density (OD) at 600 nm to 0.110±0.001 (d=0.5 cm) with fresh SD medium,  
12 then aliquots of 100 ml cell culture were continued cultivating at 30 °C, 200 rpm under dark  
13 conditions, and measured the value of optical density (OD) at 600 nm by the  
14 spectrophotometer every two hours. Growth curves of yeast strains were presented in Figure  
15 S1. Figure S1 showed that all strains' growth curves obeyed logistical growth curve ( $r >$   
16 0.9900), and except the *yap1* mutant, the biomasses of mutants were higher than that of the  
17 wild-type strain, while during the exposure time (0-4 h), the biomass of different strains were  
18 comparable ( $p > 0.05$ ).

19

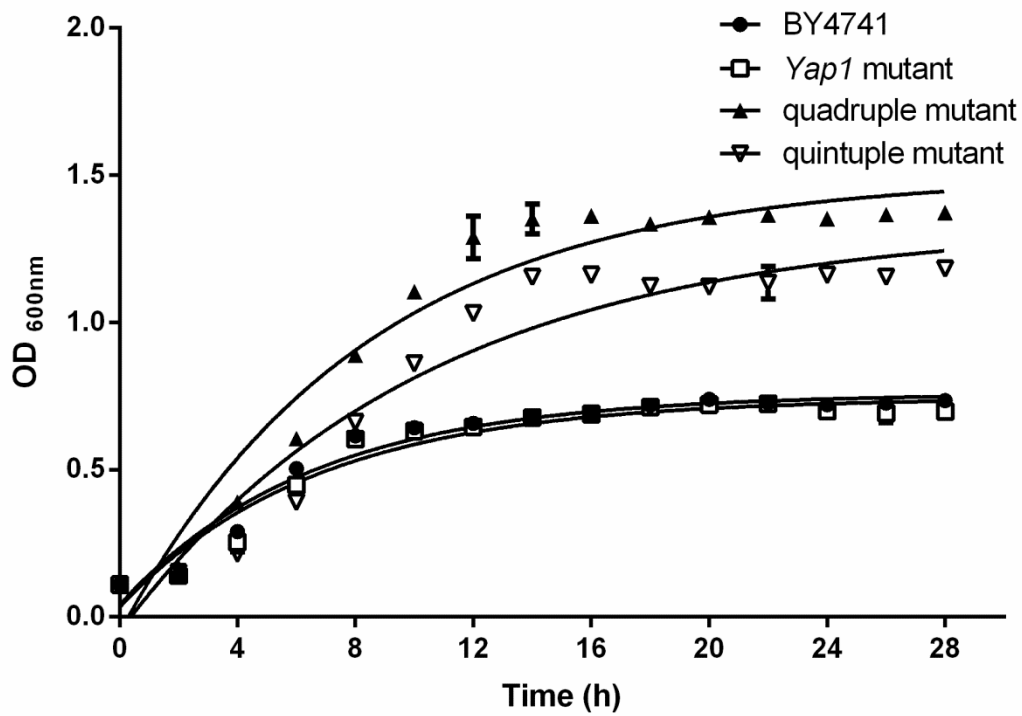

20

21 **Fig. S1** Yeast *Saccharomyces cerevisiae* wild-type BY4741 and mutants' growth in SD medium at 30 °C with 200  
 22 rpm continuous shaking during 28 h.

23

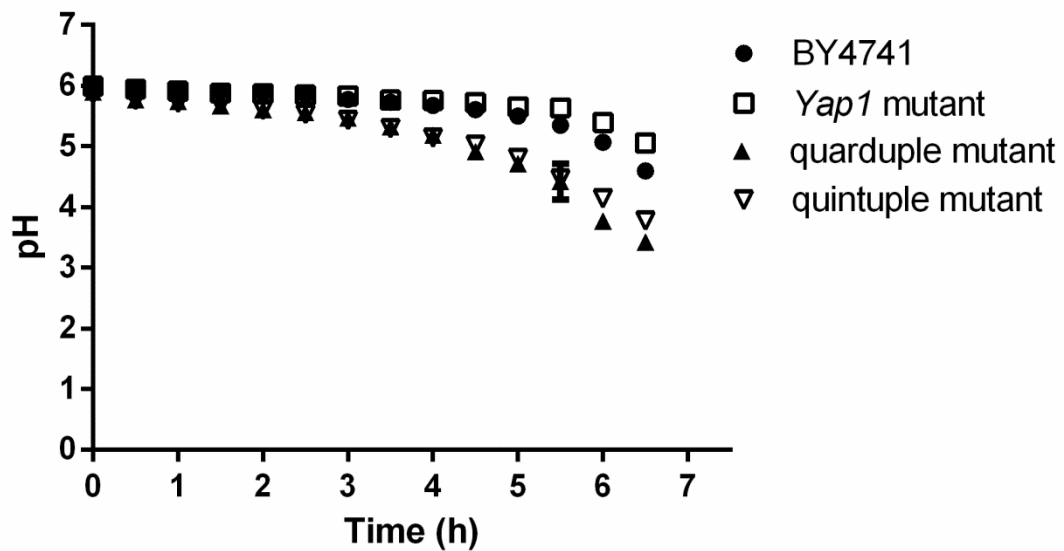

24

25 **Fig. S2** Dynamic variation of pH values in the SD medium over time in the presences of yeast wild-type and  
 26 mutants. Data are means  $\pm$  standard error of 3 independent replicates.

27

28

29

30 **References**

31

- 32 1. **Zhang M, Zhang C, Li J, Hanna M, Zhang X, Dai H, Xiao W.** 2011. Inactivation of YAP1  
33 Enhances Sensitivity of the Yeast RNR3-lacZ Genotoxicity Testing System to a Broad Range of  
34 DNA-Damaging Agents. *Toxicological Sciences* **120**:310-321.
- 35 2. **Zhang M, Hanna M, Li J, Butcher S, Dai H, Xiao W.** 2010. Creation of a Hyperpermeable Yeast  
36 Strain to Genotoxic Agents through Combined Inactivation of PDR and CWP Genes.  
37 *Toxicological Sciences* **113**:401-411.
- 38 3. **Wei T, Zhang C, Xu X, Hanna M, Zhang X, Wang Y, Dai H, Xiao W.** 2013. Construction and  
39 evaluation of two biosensors based on yeast transcriptional response to genotoxic chemicals.  
40 *Biosensors and Bioelectronics*.

41
